# Supplementary material for: Autophagy-related genes prognosis signature as potential predictive markers for immunotherapy in hepatocellular carcinoma
Source: PeerJ journal article supplement (doi:10.7717/peerj.8383), 2020-01-17

# Seven ATGs are associated with clinicopathological features of HCC in the ICGC dataset

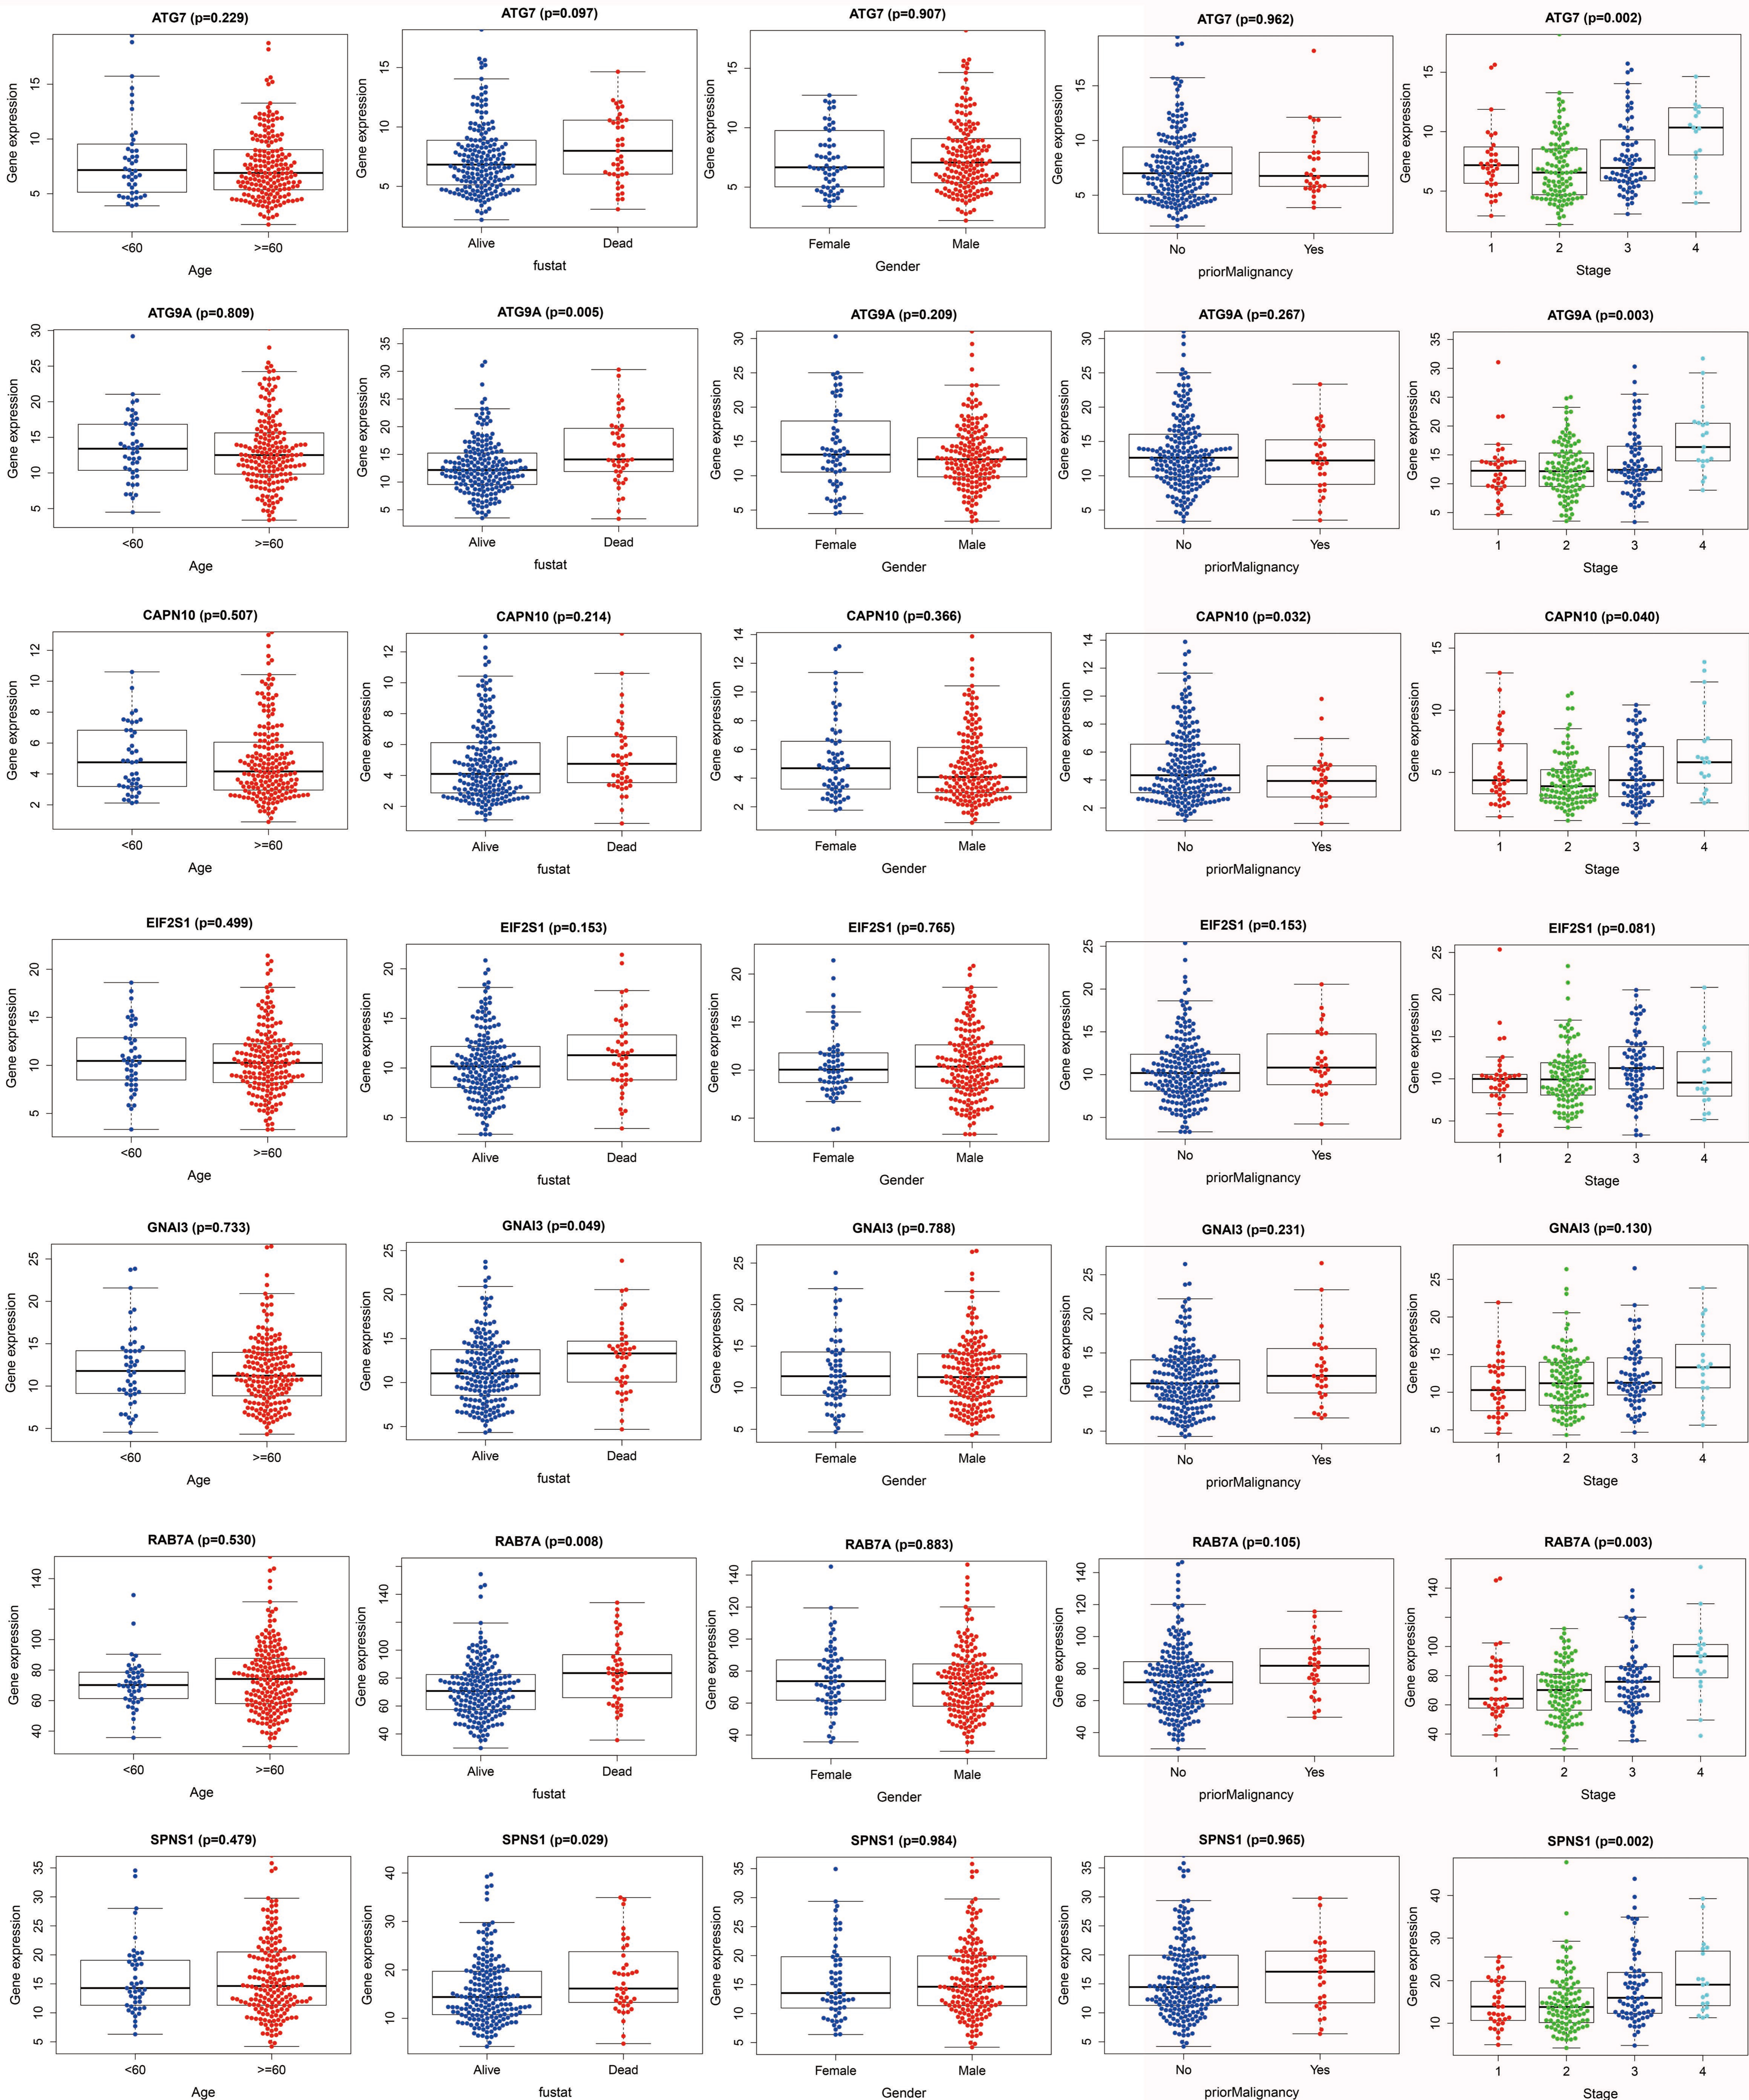

Supplement: Fig.S2.pdf [file Fig.S2.pdf]
