# Supplementary material for: Autophagy-related genes prognosis signature as potential predictive markers for immunotherapy in hepatocellular carcinoma
Source: PeerJ journal article supplement (doi:10.7717/peerj.8383), 2020-01-17

**A****TCGA**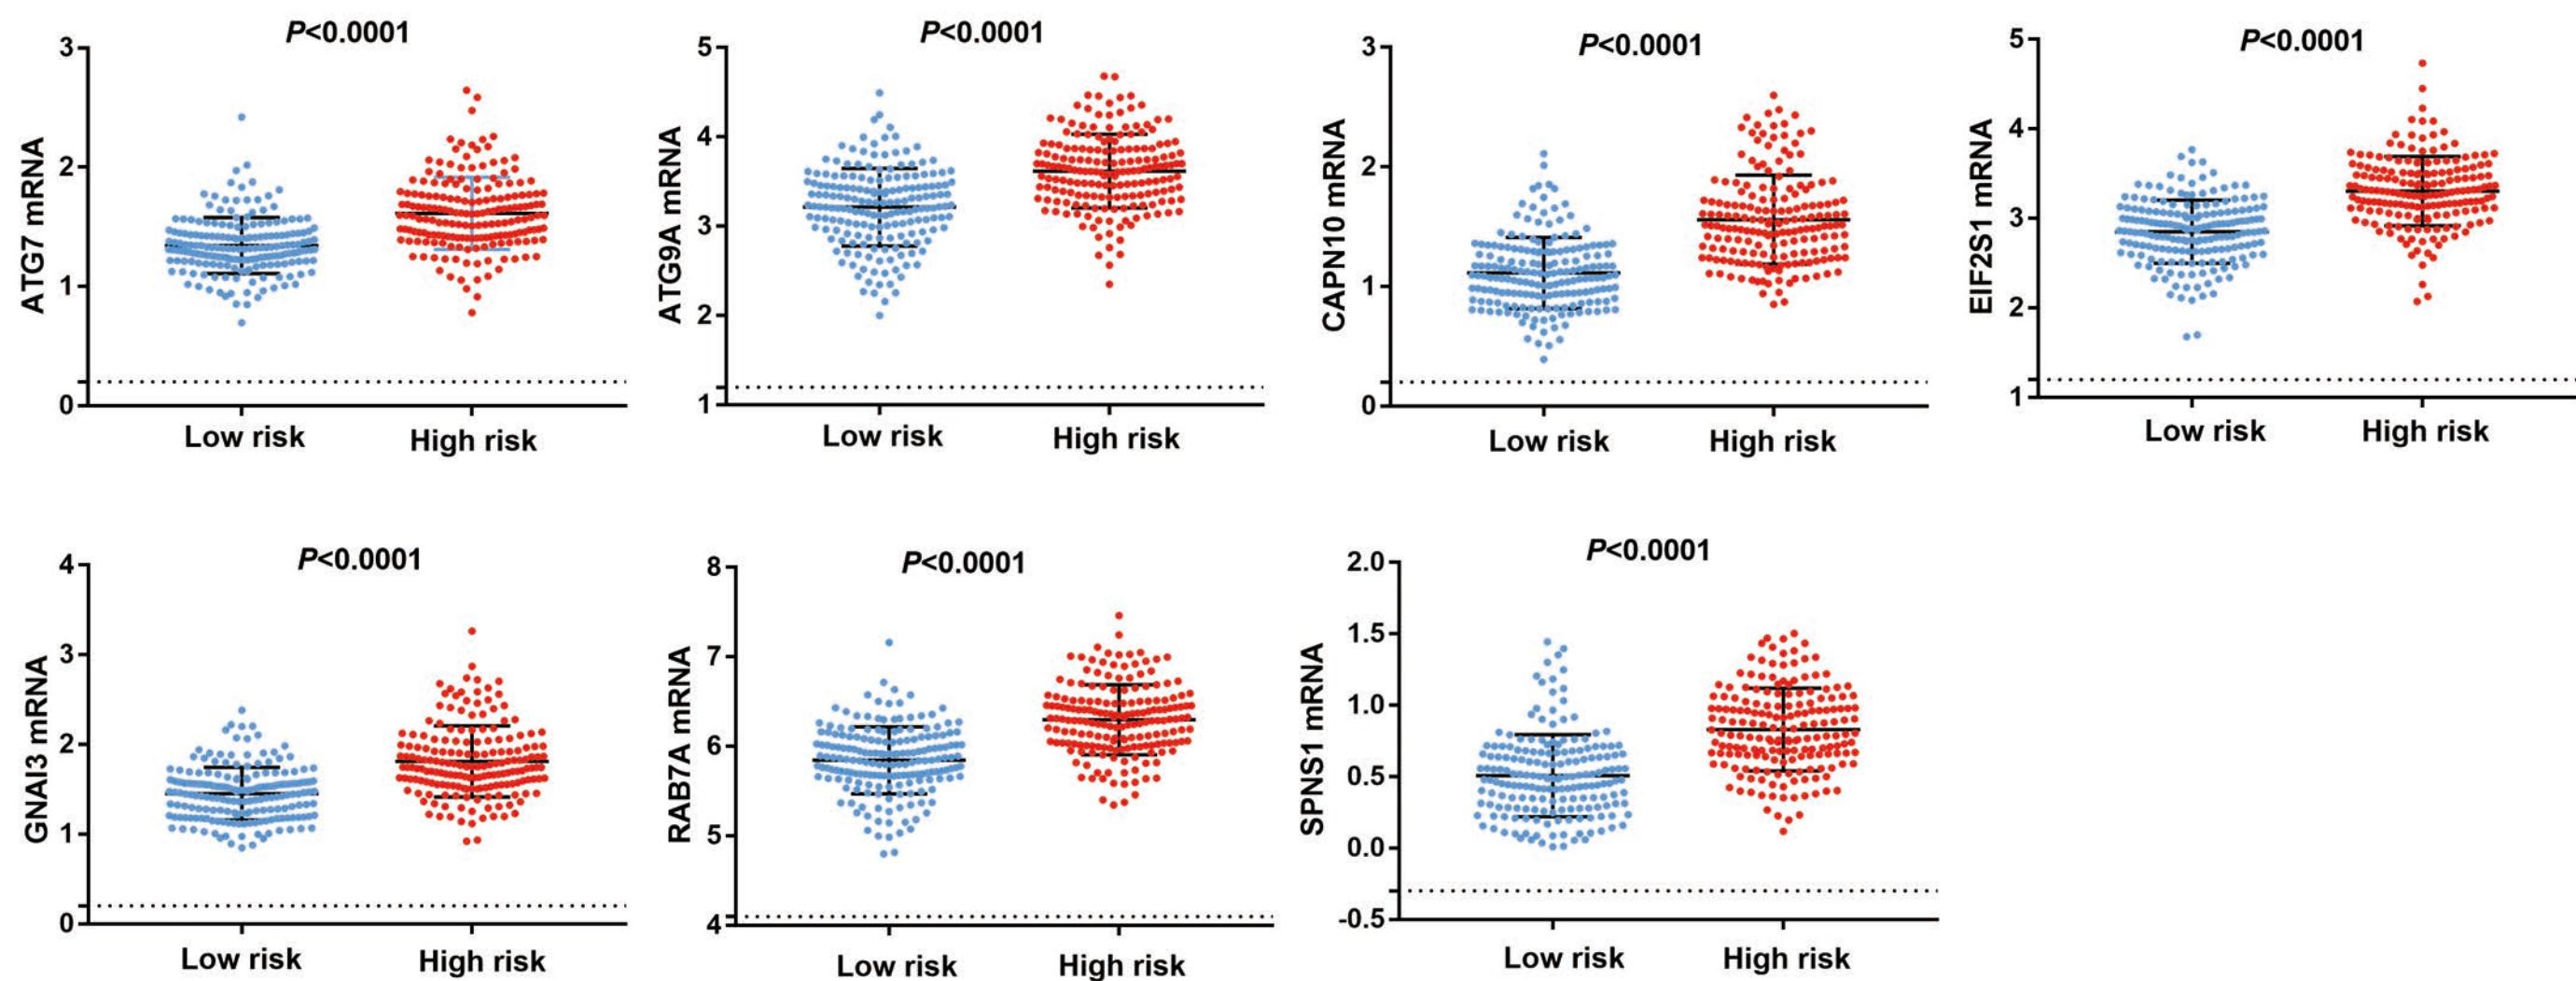**B****ICGC**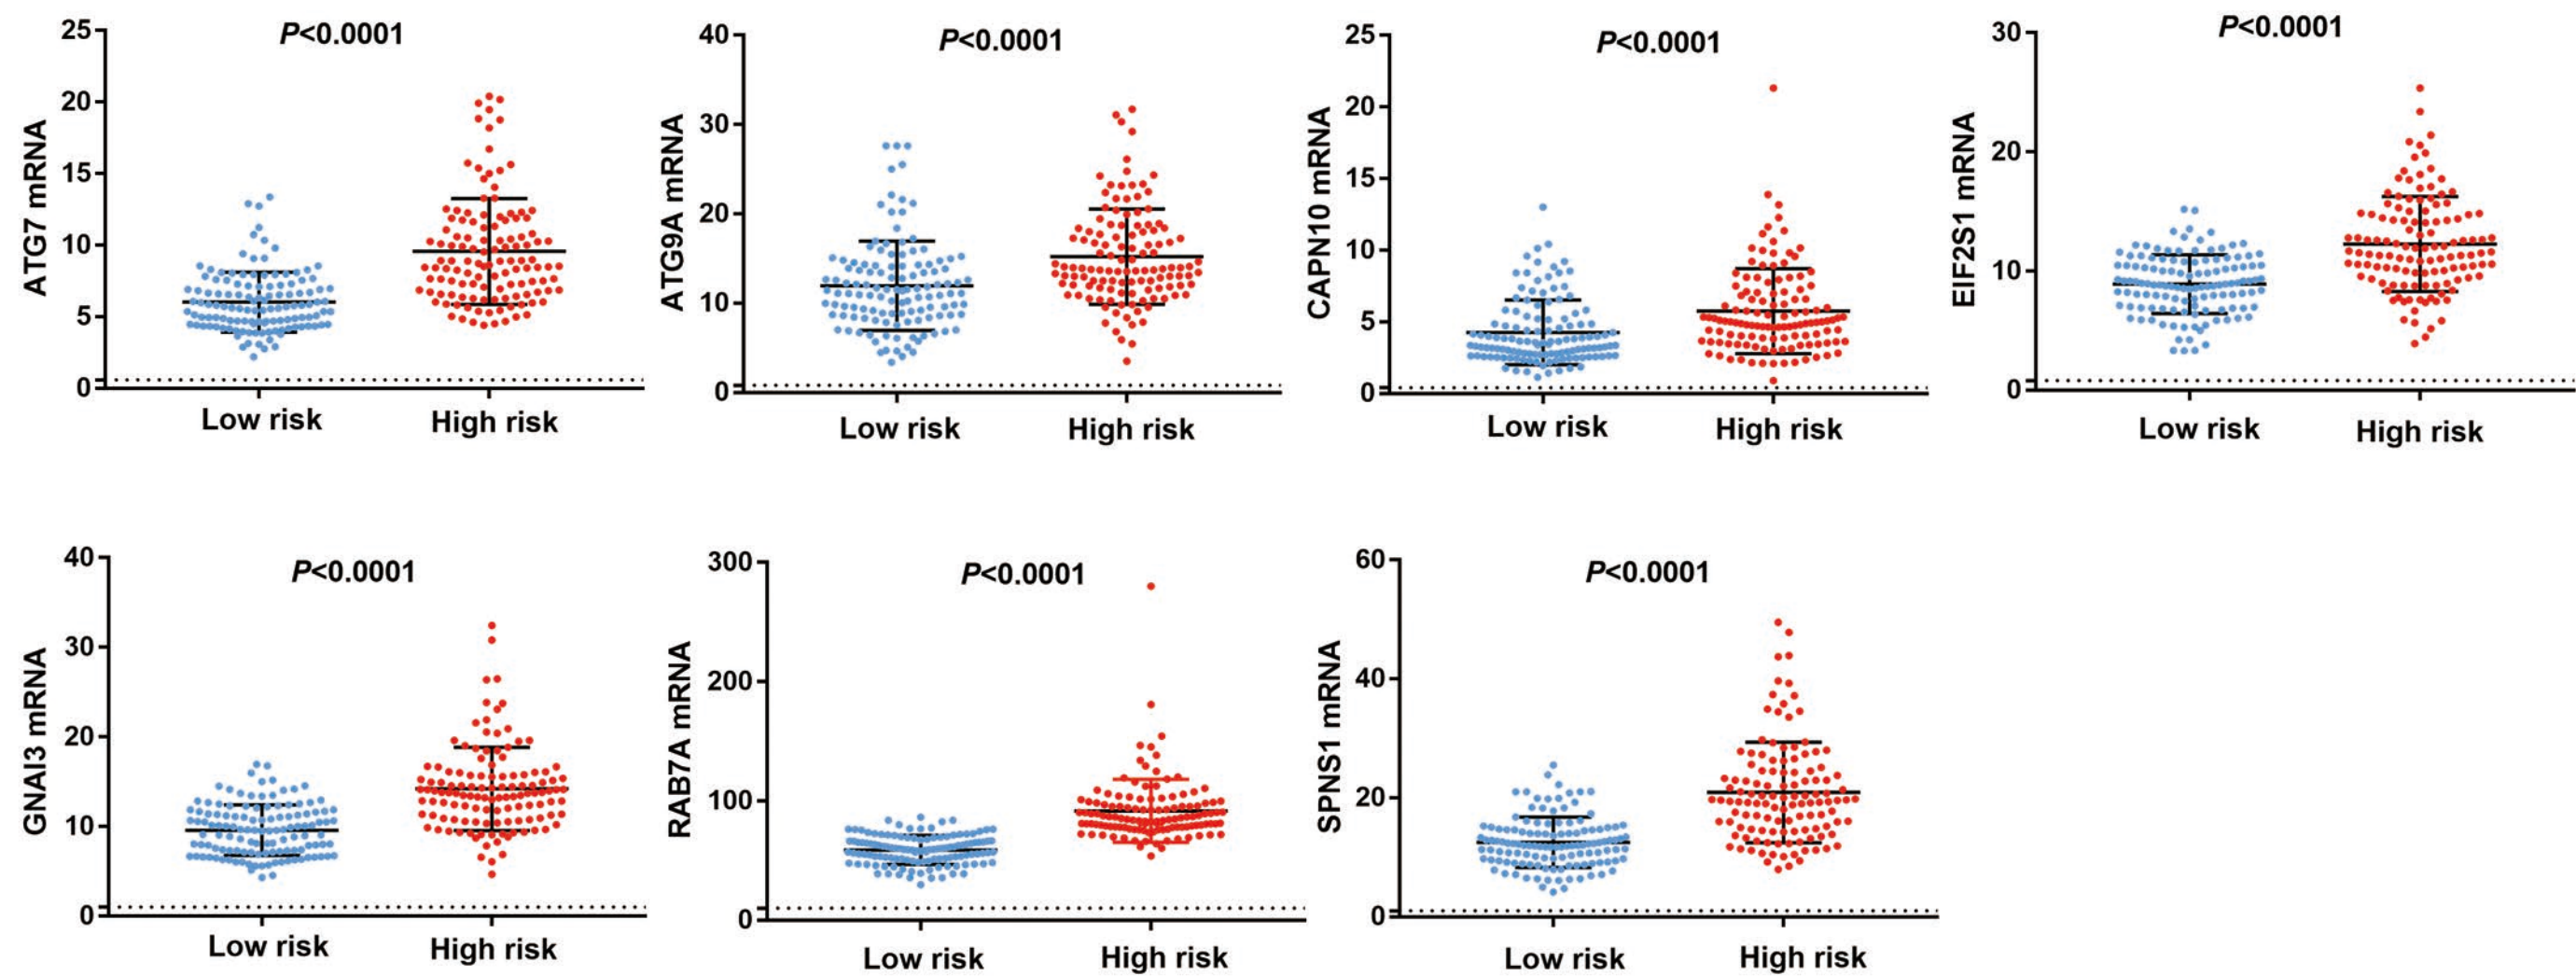

Supplement: Fig.S4.pdf [file Fig.S4.pdf]
