# Supplementary material for: Autophagy-related genes prognosis signature as potential predictive markers for immunotherapy in hepatocellular carcinoma
Source: PeerJ journal article supplement (doi:10.7717/peerj.8383), 2020-01-17
Supplement: Fig.S6.pdf [file Fig.S6.pdf]

## High risk group

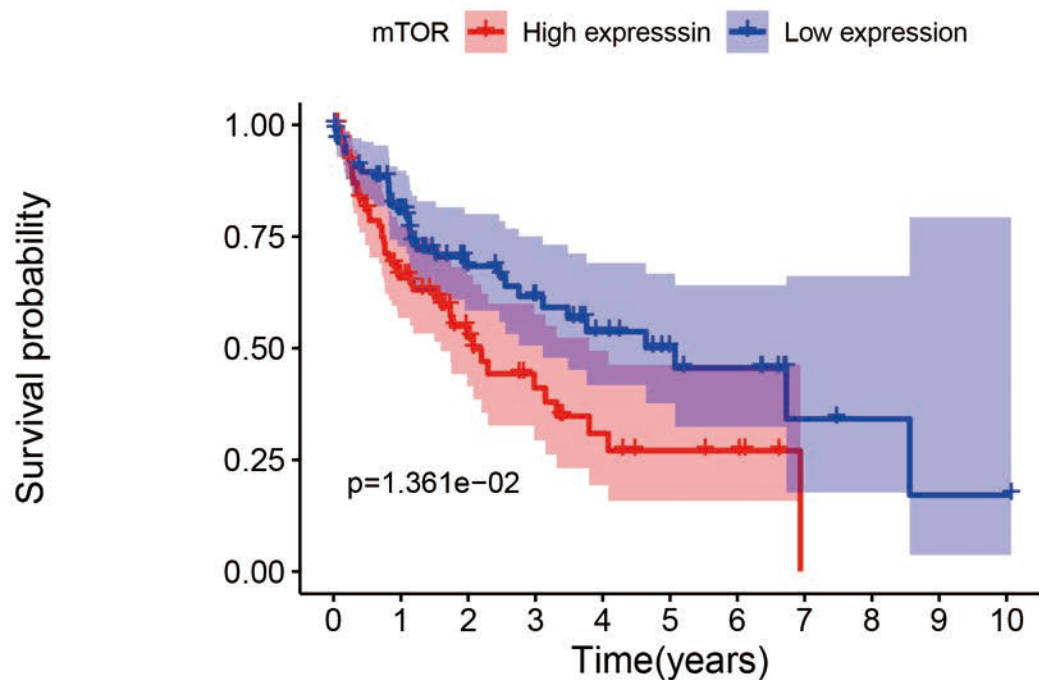

mTOR

|                 |    |    |    |    |    |    |   |   |   |   |    |
|-----------------|----|----|----|----|----|----|---|---|---|---|----|
| High expression | 91 | 47 | 21 | 13 | 8  | 5  | 4 | 0 | 0 | 0 | 0  |
| Low expression  | 91 | 61 | 32 | 26 | 17 | 11 | 9 | 3 | 2 | 1 | 1  |
|                 | 0  | 1  | 2  | 3  | 4  | 5  | 6 | 7 | 8 | 9 | 10 |

Time(years)

## Low risk group

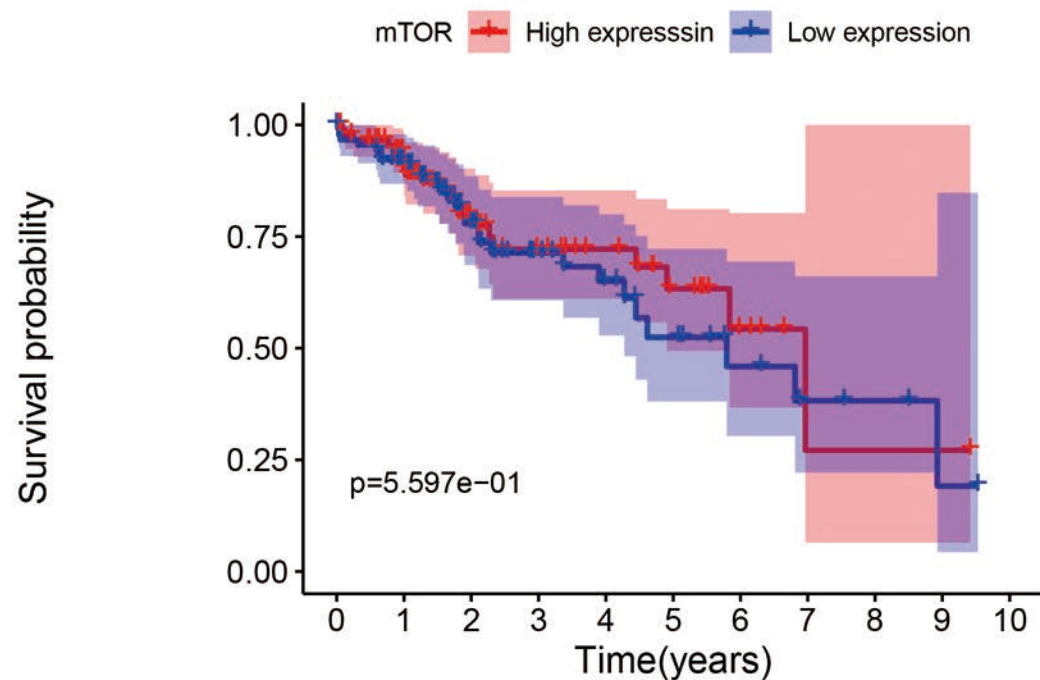

mTOR

|                 |    |    |    |    |    |    |   |   |   |   |    |
|-----------------|----|----|----|----|----|----|---|---|---|---|----|
| High expression | 92 | 71 | 34 | 25 | 20 | 12 | 5 | 1 | 1 | 1 | 0  |
| Low expression  | 91 | 75 | 39 | 25 | 18 | 12 | 7 | 4 | 3 | 1 | 0  |
|                 | 0  | 1  | 2  | 3  | 4  | 5  | 6 | 7 | 8 | 9 | 10 |

Time(years)
