# Supplementary material for: Autophagy-related genes prognosis signature as potential predictive markers for immunotherapy in hepatocellular carcinoma
Source: PeerJ journal article supplement (doi:10.7717/peerj.8383), 2020-01-17

ICGC dataset

# CIBERSORT

Wilcoxon test  $P=0.012$

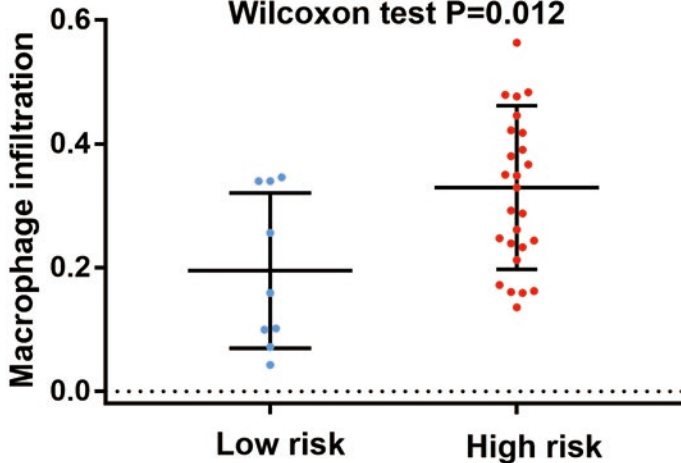

Supplement: Fig.S7.pdf [file Fig.S7.pdf]
